# Supplementary material for: Utility of Quantitative Parameters from Single-Photon Emission Computed Tomography/Computed Tomography in Patients with Destructive Thyroiditis
Source: PubMed Central journal article supplement — Korean J Radiol. 2018 Apr 6;19(3):470–80. doi: 10.3348/kjr.2018.19.3.470 (PMC5904474; doi:10.3348/kjr.2018.19.3.470), 2018-04-06
Supplement: kjr-19-470-s001.pdf [file kjr-19-470-s001.pdf]

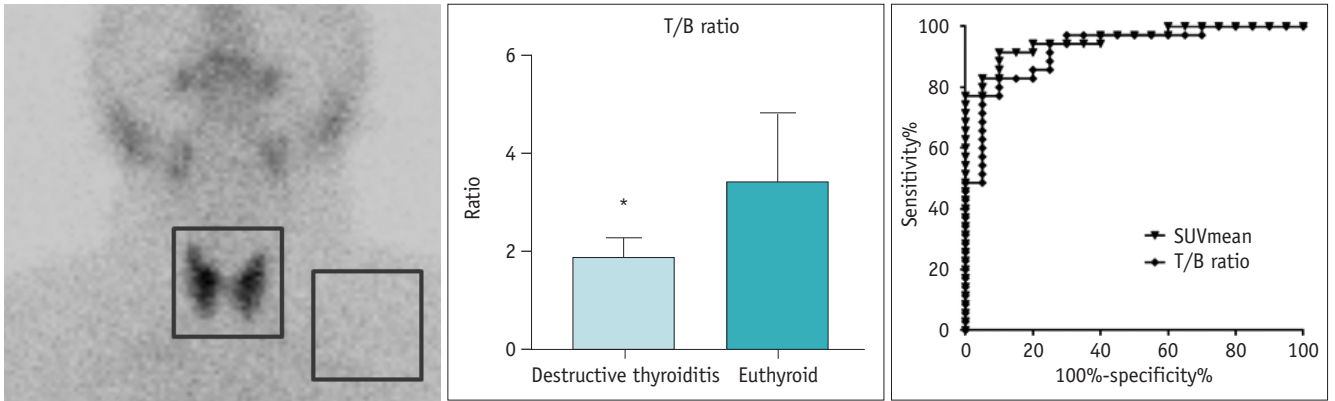

**A**

**B**

**C**

**Supplementary Fig. 1. T/B ratio.**

**A.** How to draw region-of-interest over thyroid and background. **B.** T/B ratio difference between destructive thyroiditis ( $1.83 \pm 0.44$ ) and euthyroidism ( $3.39 \pm 1.41$ ) ( $*p < 0.001$ ). **C.** Receiver-operating-characteristics analysis of SUVmean and T/B ratio without significant difference (AUC for SUVmean 0.954 with 95% CI of 0.861–0.992 vs. AUC for T/B ratio 0.924 with 95% CI of 0.820–0.978,  $p = 0.450$ ). AUC = area-under-curve, CI = confidence interval, SUV = standardized uptake value, T/B = thyroid/background
